# Supplementary material for: Novel insights into the relationships between dendritic cell subsets in human and mouse revealed by genome-wide expression profiling
Source: Springer Nature journal article supplement (doi:10.1186/gb-2008-9-1-r17), 2008-01-24
Supplement: Additional file 7 [file gb-2008-9-1-r17-s7.pdf]

| Gene signature                                                                                                                                  | expt series | genes         | Mono/Macro               | pDC   | CD8a cDC | CD11b cDC | NK    | CD8 T | CD4 T | B     | Splenocytes | Primers (F=Forward; R=Reverse)                                      |                                          |  |  |  |  |  |  |
|-------------------------------------------------------------------------------------------------------------------------------------------------|-------------|---------------|--------------------------|-------|----------|-----------|-------|-------|-------|-------|-------------|---------------------------------------------------------------------|------------------------------------------|--|--|--|--|--|--|
| non-DC                                                                                                                                          |             |               |                          |       |          |           |       |       |       |       |             |                                                                     |                                          |  |  |  |  |  |  |
|                                                                                                                                                 | #           | Gimap4        | 0.216                    | *     | *        | *         | 0.740 | 1.000 | 0.688 | 0.930 | -           | F-CGG GGT TCA TCC CAG AAA GTT; R-CCC CAA GGA TAC TGT TCC CTG        |                                          |  |  |  |  |  |  |
|                                                                                                                                                 | #           | Vps37b        | 0.603                    | *     | *        | *         | 0.601 | 1.000 | 0.504 | 0.491 | -           | F-ACA TGG TGG GGG TAT GGA; R-TTT GGG TCA GGC GAG CTT TC             |                                          |  |  |  |  |  |  |
|                                                                                                                                                 | #           | Fcer2a        | *                        | *     | *        | *         | *     | *     | *     | 1.000 | -           | F-CTG GGA ACC TCC TAG AAA GC G; R-CCC CAC CAA CAT GAG CTG T         |                                          |  |  |  |  |  |  |
|                                                                                                                                                 | \$          | Lat           | -                        | 0.004 | *        | 0.001     | *     | 0.732 | 1.000 | -     | 0.072       | F-TCC CTG TTG TCT CCT CTG CT; R-CTC TGC GCT CTC CTC ATC CT          |                                          |  |  |  |  |  |  |
| pan-DC                                                                                                                                          |             |               |                          |       |          |           |       |       |       |       |             |                                                                     |                                          |  |  |  |  |  |  |
|                                                                                                                                                 | #           | Flt3          | 0.008                    | 0.985 | 1.000    | 0.844     | *     | *     | *     | *     | -           | F-GTG ACT GGC CCC CTG GAT ACG AG; R-TCC AAG GGC GGG TGT AAC TGA ACT |                                          |  |  |  |  |  |  |
|                                                                                                                                                 | #           | Scarb1        | 0.209                    | 0.831 | 1.000    | 0.806     | *     | *     | *     | *     | -           | F-TTT GGA GTG GTA GTA AAA AGG GC; F-TGA CAT CAG GGA CTC AGA TAG     |                                          |  |  |  |  |  |  |
|                                                                                                                                                 | #           | Sh3tc1        | *                        | 0.469 | 0.910    | 1.000     | *     | *     | *     | *     | -           | F-TGT ATC CAA CAG ACC TGA CC; R-GTC TTA AAT GTC ACC ACG ATC C       |                                          |  |  |  |  |  |  |
|                                                                                                                                                 | #           | Trit1         | *                        | 1.000 | 0.459    | 0.332     | 0.012 | 0.007 | 0.015 | 0.007 | -           | F-AAG TGG TTG ATC GGA AAG TAG AG; R-CTC ATC TAG AAC TGC CTG GTC     |                                          |  |  |  |  |  |  |
|                                                                                                                                                 | \$          | Bri3bp        | -                        | 1.000 | 0.399    | 0.492     | 0.067 | 0.129 | 0.153 | -     | 0.262       | F-AGA GCG TGA GCA GCC TCT TC; R-CCA AAC TTT CCA TAA CGT CTC TAA GA  |                                          |  |  |  |  |  |  |
| cDC                                                                                                                                             |             |               |                          |       |          |           |       |       |       |       |             |                                                                     |                                          |  |  |  |  |  |  |
|                                                                                                                                                 | #           | Ciita         | 0.011                    | 0.002 | 0.755    | 1.000     | *     | *     | *     | 0.014 | -           | F-ACA CAG ATA CCA TCA ACT GC; R-CCA ATG TGC TCT ATG AAG AGG         |                                          |  |  |  |  |  |  |
|                                                                                                                                                 | #           | Arhgap22      | 0.007                    | 0.004 | 0.523    | 1.000     | *     | *     | *     | *     | -           | F-AGA TAC ATC TGC AAG TTT ATG G; R-GAT GGT TAC TGG ATC CTC TAT CTG  |                                          |  |  |  |  |  |  |
|                                                                                                                                                 | #           | Btbd4         | 0.041                    | 0.084 | 1.000    | 0.622     | *     | *     | *     | *     | -           | F-ATC ACT TCT CAC TAC CGG CAT; R-ACG TTC TTA TGT GCC TTG AAG AC     |                                          |  |  |  |  |  |  |
|                                                                                                                                                 | #           | Slamf8        | *                        | *     | 1.000    | 0.992     | *     | *     | *     | *     | -           | F-TCT CCT TCC CGT TGT GGT TG; R-CCA GAT AGC CTC ACG CAC TTG         |                                          |  |  |  |  |  |  |
|                                                                                                                                                 | \$          | 9130211i03Rik | -                        | 0.004 | 1.000    | 0.841     | *     | *     | *     | -     | 0.015       | F-CGG AAG AAG CAG ACC CAG AAG; R-CTG CGC AGC ACA GAG TTC TC         |                                          |  |  |  |  |  |  |
|                                                                                                                                                 | \$          | Nav-1         | -                        | 0.007 | 0.052    | 1.000     | *     | *     | *     | -     | 0.046       | F-CTC AAA GTC GCA GGC AAA CC; R-GAG CGT TGT AGC CCA GTG TTC C       |                                          |  |  |  |  |  |  |
| CD8a cDC                                                                                                                                        |             |               |                          |       |          |           |       |       |       |       |             |                                                                     |                                          |  |  |  |  |  |  |
|                                                                                                                                                 | #           | Igsf4a        | 0.159                    | 0.144 | 1.000    | 0.419     | *     | *     | *     | *     | -           | F-GAT CCC CAC AGG TGA TGG AC; R-TGA TGG TTG CCA CTT CTC CT T        |                                          |  |  |  |  |  |  |
|                                                                                                                                                 | #           | Gcet2         | *                        | *     | 1.000    | *         | *     | *     | *     | *     | -           | F-AGG ACAA CCA GAT ACT TCA GGG; R-AGG ATG TAG CAC AAC TCT TCT GT    |                                          |  |  |  |  |  |  |
|                                                                                                                                                 | #           | BC028528      | *                        | *     | 1.000    | *         | *     | *     | *     | *     | -           | F-TTG ACC TTT GTC CCA ATG C; R-AGG TTG GAG GCA CAC ATA GG           |                                          |  |  |  |  |  |  |
| CD11b cDC                                                                                                                                       |             |               |                          |       |          |           |       |       |       |       |             |                                                                     |                                          |  |  |  |  |  |  |
|                                                                                                                                                 | #           | Pram1         | *                        | *     | *        | 1.000     | *     | *     | *     | *     | -           | F-CCC ATC AAT ATC CAA AGC TTC AG; R-ACA GCA TTT CAT CTC TGC CT      |                                          |  |  |  |  |  |  |
|                                                                                                                                                 | #           | Cyp4f16       | *                        | *     | *        | 1.000     | *     | *     | *     | *     | -           | F-GCT GAC ACC TTT ATG TTT GGA; R-AGG TCG TCC CAT TCA ATC TC         |                                          |  |  |  |  |  |  |
|                                                                                                                                                 | #           | Gpr43         | *                        | *     | 0.001    | 1.000     | *     | *     | *     | *     | -           | F-GAT TAC AGG TTC CAC AGC AC; R-AGT TCT GAC TGC TCA CAT CC          |                                          |  |  |  |  |  |  |
| pDC                                                                                                                                             |             |               |                          |       |          |           |       |       |       |       |             |                                                                     |                                          |  |  |  |  |  |  |
|                                                                                                                                                 | #           | SiglecH       | *                        | 1.000 | *        | *         | *     | *     | *     | *     | -           | F-GGA GGC AAA ACA TGG AAT TTA TG; R-CAC ATC ACA TTG GTA GGA CGA C   |                                          |  |  |  |  |  |  |
|                                                                                                                                                 | #           | Epha2         | *                        | 1.000 | *        | *         | *     | *     | *     | *     | -           | F-GGC CGA GCG CAT CTT TAT TG; R-AGT CAC TGC TGA CCG TGA TCT         |                                          |  |  |  |  |  |  |
|                                                                                                                                                 | #           | Pacsin1       | *                        | 1.000 | *        | *         | *     | *     | *     | *     | -           | F-GAG GTG GGG AAC TAC AAG CG; R-GTA TGC CTT CTC GAT CTT GGC         |                                          |  |  |  |  |  |  |
|                                                                                                                                                 | \$          | Tex2          | -                        | 1.000 | 0.105    | 0.039     | 0.002 | 0.046 | 0.331 | -     | 0.105       | F-CCG GCG GGT GTT TCT G; R-GAC TGC TGT GCC TGC TGT GT               |                                          |  |  |  |  |  |  |
|                                                                                                                                                 | \$          | Runx2         | -                        | 1.000 | 0.005    | 0.040     | 0.172 | 0.009 | 0.005 | -     | 0.021       | F-CCA GGC AGG TGC TTC AGA A; R-AGG GAT GAA ATG CTT GGG AAC T        |                                          |  |  |  |  |  |  |
|                                                                                                                                                 | \$          | Tcf4          | -                        | 0.398 | 0.049    | 0.026     | 0.179 | 0.002 | 0.010 | -     | 1.000       | F-GGG CTC AGG GTA CGG AAC TAG; R-TCA GAC CCA CGC CAT C              |                                          |  |  |  |  |  |  |
|                                                                                                                                                 |             |               | * = NOT DETECTED         |       |          |           |       |       |       |       |             |                                                                     |                                          |  |  |  |  |  |  |
|                                                                                                                                                 |             |               | - = NOT TESTED           |       |          |           |       |       |       |       |             |                                                                     |                                          |  |  |  |  |  |  |
| Samples were run on an ABI 7900HT Fast Real-Time PCR System (Applied Biosystems), 40 cycles, using the QuantiTect SYBR Green PCR Kit (Qiagen)   |             |               |                          |       |          |           |       |       |       |       |             |                                                                     |                                          |  |  |  |  |  |  |
| Relative gene expression was calculated using the $\Delta\Delta Ct$ method                                                                      |             |               |                          |       |          |           |       |       |       |       |             |                                                                     |                                          |  |  |  |  |  |  |
| TATA box binding protein (TBP) and Hypoxanthine-guanine phosphoribosyltransferase (Hprt) were used as the endogenous control housekeeping genes |             |               |                          |       |          |           |       |       |       |       |             |                                                                     |                                          |  |  |  |  |  |  |
| For each gene, the value for the cell type with highest expression was calculated as 1                                                          |             |               |                          |       |          |           |       |       |       |       |             |                                                                     |                                          |  |  |  |  |  |  |
| # experiment series 1 with TBP housekeeping control gene (SHR)                                                                                  |             |               |                          |       |          |           |       |       |       |       |             |                                                                     |                                          |  |  |  |  |  |  |
| \$ experiment series 2 with Hprt housekeeping control gene (GB)                                                                                 |             |               |                          |       |          |           |       |       |       |       |             |                                                                     |                                          |  |  |  |  |  |  |
|                                                                                                                                                 |             | Primers for   |                          |       |          |           |       |       |       |       |             |                                                                     |                                          |  |  |  |  |  |  |
|                                                                                                                                                 |             | TBP           | F-AGAACAATCCAGACTAGCAGCA |       |          |           |       |       | Hprt  |       |             |                                                                     | F-GGC CCT CTG TGT GCT CAA G              |  |  |  |  |  |  |
|                                                                                                                                                 |             |               | R-GGGAACCTTCACATCACAGCTC |       |          |           |       |       |       |       |             |                                                                     | R-CTG ATA AAA TCT ACA GTC ATA GGA ATG GA |  |  |  |  |  |  |
